# Supplementary material for: MKLN1 splicing defect in dogs with lethal acrodermatitis
Source: PubMed Central journal article supplement (PMC5863938; doi:10.1371/journal.pgen.1007264), 2018-03-22
Supplement: pgen.1007264.s002.pdf [file pgen.1007264.s002.pdf]

## S2 Figure: Predicted amino acid sequences of the wildtype and mutant *MKLN1* proteins

|                  |                                    |                       |
|------------------|------------------------------------|-----------------------|
| Genetic variant: | Chr14:5,731,405T>G                 | (CanFam 3.1 assembly) |
|                  | <i>MKLN1</i> :c.400+3A>C           | (XM_005628367.3)      |
|                  | <i>MKLN1</i> :r.312_400del         | (XM_005628367.3)      |
|                  | <i>MKLN1</i> :p.(Gly105SerfsTer10) | (XP_005628424.1)      |

  

|          |                                                                    |     |          |                  |
|----------|--------------------------------------------------------------------|-----|----------|------------------|
| wildtype | maaggavaaa pecrllpyal hkwssfssty lpenilvdkp ndqssrwsse snyppqylil  | 60  | 1..160   | discoidin domain |
|          |                                                                    |     |          |                  |
| mutant   | maaggavaaa pecrllpyal hkwssfssty lpenilvdkp ndqssrwsse snyppqylil  | 60  |          |                  |
| wildtype | klerpaivqn itfgkyekth vcnlkkfkvf ggmneenmte llssglnkndy nketftlkhh | 120 |          |                  |
|          |                                                                    |     |          |                  |
| mutant   | klerpaivqn itfgkyekth vcnlkkfkvf ggmneenmte llsssalivg tql         | 113 |          |                  |
| wildtype | ideqmfpcrf ikivpllswg psfnfsiywv elsgiddpdv vqpclnwysk yregeairlc  | 180 | 172..204 | LisH domain      |
| wildtype | lkhfrqhnyt eafeslqkkt kialehpmlt dlhdklvkkg dfdaceelxe kavndglnfnq | 240 | 206..258 | CTLH domain      |
| wildtype | yisqqeykpr wsqiipkstk gdgednrpgm rgghqmvidv qte                    | 300 | 284..330 | Kelch 1          |
| wildtype | waysvkenqw tcisrdteke ngpsarschk mcidiqrrqi ytlgryldss vrnsklsksd  | 360 | 339..391 | Kelch 2          |
| wildtype | fyrydidtnt wmlsedtaa dggpklyfdh qmcmdsekhn iytfggrilt cngsvddsra   | 420 | 408..458 | Kelch 3          |
| wildtype | sepqfsglfa fncqcqtwk1 lredscnagp ediqsrighc mlfhsknrcl yvfggxrskt  | 480 | 469..515 | Kelch 4          |
| wildtype | ylndffsydv dsdhvdiisd gtkkdsqmv mtgftqrati dpelneihvl sglskdkekr   | 540 | 526..578 | Kelch 5          |
| wildtype | eenvrnsfwi ydivrnsWSC vykndqaakd npskslqee pcpfrfahqlv ydelhkvhyl  | 600 | 597..651 | Kelch 6          |
| wildtype | fggnpgkscs pkmrlddfws lklcrpskdy llrhckylir khrfeekaqm dplsalkylq  | 660 |          |                  |
| wildtype | ndlyitvdhs dpeetkefql lasalfksgs dftalgsdv dhyaqrtql fdtlvnffpd    | 720 |          |                  |
| wildtype | smtppkgnlv dlitl                                                   | 735 |          |                  |

An alignment of the canine wildtype *MKLN1* protein with the predicted translation product of the mutant transcript is shown. Skipping of exon 4 leads to a frameshift and an early premature stop codon. The predicted mutant protein lacks 630 amino acids (86%) of the wildtype protein. The wildtype canine *MKLN1* protein has the same length of 735 amino acids as the human *MKLN1* protein (NP\_037387.2) and differs in only 6 amino acids from its human homolog, which corresponds to 99.2% sequence identity. Important functional domains of *MKLN1* are highlighted and annotated.
